# Supplementary material for: Factors Predicting Post-Traumatic Positive and Negative Psychological Changes Experienced by Nurses during a Pandemic COVID-19: A Cross-Sectional Study
Source: MDPI journal article supplement (doi:10.3390/ijerph19127073), 2022-06-09
Supplement: s1 [file s1]

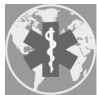

---

*Supplementary Materials*

# **Factors Predicting Post-Traumatic Positive and Negative Psychological Changes Experienced by Nurses During a Pandemic COVID-19: A Cross-Sectional Study**

Grzegorz Józef Nowicki, Barbara Ślusarska, Bożena Zboina, Aneta Jędrzejewska and Marzena Kotus

**Table S1.** Relationship between the positive outlook of the COVID-19 pandemic and selected sociodemographic and cognitive variables in woman.

| Variables                                                                                    | Changes in Outlook Questionnaire – subscale Positive Change |       |          |         |       |          |                |        |       |          |                |
|----------------------------------------------------------------------------------------------|-------------------------------------------------------------|-------|----------|---------|-------|----------|----------------|--------|-------|----------|----------------|
|                                                                                              | Model A                                                     |       |          | Model B |       |          | Model C        |        |       |          |                |
| Sociodemographic variables:                                                                  | b                                                           | SE    | <i>p</i> | b       | SE    | <i>p</i> | R <sup>2</sup> | b      | SE    | <i>p</i> | R <sup>2</sup> |
| Age                                                                                          | 0.004                                                       | 0.02  | 0.84     |         |       |          |                |        |       |          |                |
| Place of residence (reference category: Urban area)                                          | 0                                                           | 0     | 0        | 0       | 0     | 0        |                | 0      | 0     | 0        |                |
| Rular area                                                                                   | 0.836                                                       | 0.476 | 0.076    | 0.608   | 0.486 | 0.212    |                | 0.588  | 0.394 | 0.137    |                |
| Education (reference category: Bachelor’s degree)                                            | 0                                                           | 0     | 0        | 0       | 0     | 0        |                | 0      | 0     | 0        |                |
| Master’s degree or above                                                                     | -0.106                                                      | 0.456 | 0.86     |         |       |          |                |        |       |          |                |
| Postgraduate education (reference category: Specialist training course)                      | 0                                                           | 0     | 0        | 0       | 0     | 0        |                | 0      | 0     | 0        |                |
| Postgraduate diploma                                                                         | -0.918                                                      | 0.708 | 0.196    |         |       |          |                |        |       |          |                |
| Qualification course                                                                         | -0.162                                                      | 0.714 | 0.82     |         |       |          |                |        |       |          |                |
| Marital status (reference category: Married)                                                 | 0                                                           | 0     | 0        | 0       | 0     | 0        |                | 0      | 0     | 0        |                |
| Single                                                                                       | -0.986                                                      | 0.5   | 0.05     | -0.858  | 0.51  | 0.094    |                | -0.385 | 0.415 | 0.354    |                |
| Divorced/Separated/Widowed                                                                   | -1.514                                                      | 0.751 | 0.045    | -1.382  | 0.75  | 0.052    |                | -0.183 | 0.619 | 0.768    |                |
| Living arrangements (reference category: Family)                                             | 0                                                           | 0     | 0        | 0       | 0     | 0        | 3%             | 0      | 0     | 0        | 38%            |
| Cohabitant/Flat mate or Roommate                                                             | -0.862                                                      | 0.803 | 0.284    |         |       |          |                |        |       |          |                |
| Alone                                                                                        | -0.655                                                      | 0.55  | 0.235    |         |       |          |                |        |       |          |                |
| Child(ren) in House (reference category: No)                                                 | 0                                                           | 0     | 0        | 0       | 0     | 0        |                | 0      | 0     | 0        |                |
| Yes                                                                                          | 0.402                                                       | 0.782 | 0.405    |         |       |          |                |        |       |          |                |
| Rotating shift schedule (reference category: No)                                             | 0                                                           | 0     | 0        | 0       | 0     | 0        |                | 0      | 0     | 0        |                |
| Yes                                                                                          | 0.598                                                       | 0.483 | 0.217    |         |       |          |                |        |       |          |                |
| Have you nursed a patient diagnosed with COVID-19 (reference category: No)                   | 0                                                           | 0     | 0        | 0       | 0     | 0        |                | 0      | 0     | 0        |                |
| Yes                                                                                          | 0.518                                                       | 0.455 | 0.256    |         |       |          |                |        |       |          |                |
| Was there any training related to the coronavirus epidemic at work? (reference category: No) | 0                                                           | 0     | 0        | 0       | 0     | 0        |                | 0      | 0     | 0        |                |
| Yes                                                                                          | 0.598                                                       | 0.465 | 0.215    |         |       |          |                |        |       |          |                |
| Cognitive variables:                                                                         |                                                             |       |          |         |       |          |                |        |       |          |                |

|                            |       |       |        |       |       |        |     |       |       |        |
|----------------------------|-------|-------|--------|-------|-------|--------|-----|-------|-------|--------|
| IES-R – Total score        | 0.908 | 0.356 | 0.011  | 1.689 | 0.315 | <0.001 |     | 1.629 | 0.319 | <0.001 |
| MSPSS – Total score        | 0.124 | 0.016 | <0.001 | 0.059 | 0.016 | <0.001 |     | 0.062 | 0.016 | <0.001 |
| SEQ – Sense of safety      | 1.677 | 0.276 | <0.001 | 1.48  | 0.262 | <0.001 | 37% | 1.444 | 0.264 | <0.001 |
| SEQ – Reflection on safety | 3.436 | 0.469 | <0.001 | 1.37  | 0.453 | 0.003  |     | 1.353 | 0.452 | 0.003  |
| MLQ – Total score          | 1.81  | 0.246 | <0.001 | 1.226 | 0.237 | <0.001 |     | 1.175 | 0.239 | <0.001 |

Model A: univariable analysis; Model B: included significant factors in univariable analysis (performed separately for sociodemographic and cognitive factors); Model C: included all significant factors in univariable analysis; CIOQ: Changes in Outlook Questionnaire; IES-R: Impact Event Scale-Revised; MSPSS: Multidimensional Scale of Perceived Social Support; SEQ: Safety Experience Questionnaire; MLQ: Meaning in Life Questionnaire; b: standardised beta coefficient; SE: standard error

**Table S2.** Relationship between the negative perspective of the COVID-19 pandemic and selected sociodemographic and cognitive variables in woman.

| Variables                                                                                    | Changes in Outlook Questionnaire – subscale Negative Change |       |          |         |       |          |                |         |       |          |                |
|----------------------------------------------------------------------------------------------|-------------------------------------------------------------|-------|----------|---------|-------|----------|----------------|---------|-------|----------|----------------|
|                                                                                              | Model A                                                     |       |          | Model B |       |          | R <sup>2</sup> | Model C |       |          | R <sup>2</sup> |
| Sociodemographic variables:                                                                  | b                                                           | SE    | <i>p</i> | b       | SE    | <i>p</i> |                | b       | SE    | <i>p</i> |                |
| Age                                                                                          | -0.062                                                      | 0.022 | 0.005    | -0.016  | 0.033 | 0.624    |                | -0.026  | 0.028 | 0.357    |                |
| Place of residence (reference category: Urban area)                                          | 0                                                           | 0     | 0        | 0       | 0     | 0        |                | 0       | 0     | 0        |                |
| Rular area                                                                                   | 0.548                                                       | 0.527 | 0.299    |         |       |          |                |         |       |          |                |
| Education (reference category: Bachelor’s degree)                                            | 0                                                           | 0     | 0        | 0       | 0     | 0        |                | 0       | 0     | 0        |                |
| Master’s degree or above                                                                     | -1.341                                                      | 0.497 | 0.007    | -1.234  | 0.491 | 0.012    |                | -0.987  | 0.42  | 0.02     |                |
| Postgraduate education (reference category: Specialist training course)                      | 0                                                           | 0     | 0        | 0       | 0     | 0        |                | 0       | 0     | 0        |                |
| Postgraduate diploma                                                                         | 0.702                                                       | 0.766 | 0.36     | 0.475   | 0.762 | 0.533    |                | 0.44    | 0.659 | 0.501    |                |
| Qualification course                                                                         | 2.021                                                       | 0.525 | <0.001   | 1.331   | 0.586 | 0.024    |                | 1.187   | 0.502 | 0.019    |                |
| Marital status (reference category: Married)                                                 | 0                                                           | 0     | 0        | 0       | 0     | 0        |                | 0       | 0     | 0        |                |
| Single                                                                                       | 1.961                                                       | 0.546 | <0.001   | 2.085   | 0.961 | 0.03     |                | 1.187   | 0.502 | 0.026    |                |
| Divorced/Separated/Widowed                                                                   | 0.467                                                       | 0.819 | 0.568    | 0.797   | 0.815 | 0.329    | 9%             | 1.118   | 0.705 | 0.114    | 38%            |
| Living arrangements (reference category: Family)                                             | 0                                                           | 0     | 0        | 0       | 0     | 0        |                | 0       | 0     | 0        |                |
| Cohabitant/ Flat mate or Roommate                                                            | 0.624                                                       | 0.607 | 0.307    |         |       |          |                |         |       |          |                |
| Alone                                                                                        | 0.678                                                       | 0.886 | 0.445    |         |       |          |                |         |       |          |                |
| Child(ren) in House (reference category: No)                                                 | 0                                                           | 0     | 0        | 0       | 0     | 0        |                | 0       | 0     | 0        |                |
| Yes                                                                                          | -1.266                                                      | 0.526 | 0.017    | 1.051   | 0.959 | 0.274    |                | 0.857   | 0.822 | 0.298    |                |
| Rotating shift schedule (reference category: No)                                             | 0                                                           | 0     | 0        | 0       | 0     | 0        |                | 0       | 0     | 0        |                |
| Yes                                                                                          | 0.794                                                       | 0.532 | 0.136    |         |       |          |                |         |       |          |                |
| Have you nursed a patient diagnosed with COVID-19 (reference category: No)                   | 0                                                           | 0     | 0        | 0       | 0     | 0        |                | 0       | 0     | 0        |                |
| Yes                                                                                          | 0.391                                                       | 0.501 | 0.436    |         |       |          |                |         |       |          |                |
| Was there any training related to the coronavirus epidemic at work? (reference category: No) | 0                                                           | 0     | 0        | 0       | 0     | 0        |                | 0       | 0     | 0        |                |
| Yes                                                                                          | -0.589                                                      | 0.479 | 0.636    |         |       |          |                |         |       |          |                |
| Cognitive variables:                                                                         |                                                             |       |          |         |       |          |                |         |       |          |                |
| IES-R – Total score                                                                          | 3.172                                                       | 0.352 | <0.001   | 2.594   | 0.374 | <0.001   | 27%            | 2.624   | 0.363 | <0.001   |                |

|                            |        |       |        |        |       |       |        |       |       |
|----------------------------|--------|-------|--------|--------|-------|-------|--------|-------|-------|
| MSPSS - Total              | -0.055 | 0.019 | 0.004  | -0.034 | 0.019 | 0.072 | -0.042 | 0.018 | 0.021 |
| SEQ – Sense of safety      | -1.532 | 0.310 | <0.001 | -0.656 | 0.311 | 0.036 | -0.606 | 0.301 | 0.045 |
| SEQ – Reflection on safety | 1.209  | 0.588 | 0.047  | 1.303  | 0.536 | 0.016 | 1.236  | 0.522 | 0.016 |
| MLQ – Total score          | -1.316 | 0.284 | <0.001 | -0.956 | 0.280 | 0.001 | -0.784 | 0.273 | 0.004 |

---

Model A: univariable analysis; Model B: included significant factors in univariable analysis (performed separately for sociodemographic and cognitive factors); Model C: included all significant factors in univariable analysis; CIOQ: Changes in Outlook Questionnaire; IES-R: Impact Event Scale-Revised; MSPSS: Multidimensional Scale of Perceived Social Support; SEQ: Safety Experience Questionnaire; MLQ: Meaning in Life Questionnaire; b: standardised beta coefficient; SE: standard error
